# Supplementary material for: Tumour-associated macrophages exhibit anti-tumoural properties in Sonic Hedgehog medulloblastoma
Source: PubMed Central journal article supplement (PMC6546707; doi:10.1038/s41467-019-10458-9), 2019-06-03
Supplement: 41467_2019_10458_MOESM1_ESM.pdf [file 41467_2019_10458_MOESM1_ESM.pdf]

# **Tumour-Associated Macrophages Exhibit Anti-Tumoural Properties in Sonic Hedgehog Medulloblastoma**

Maximov et al.

Supplementary Information

## Supplementary Figure 1.

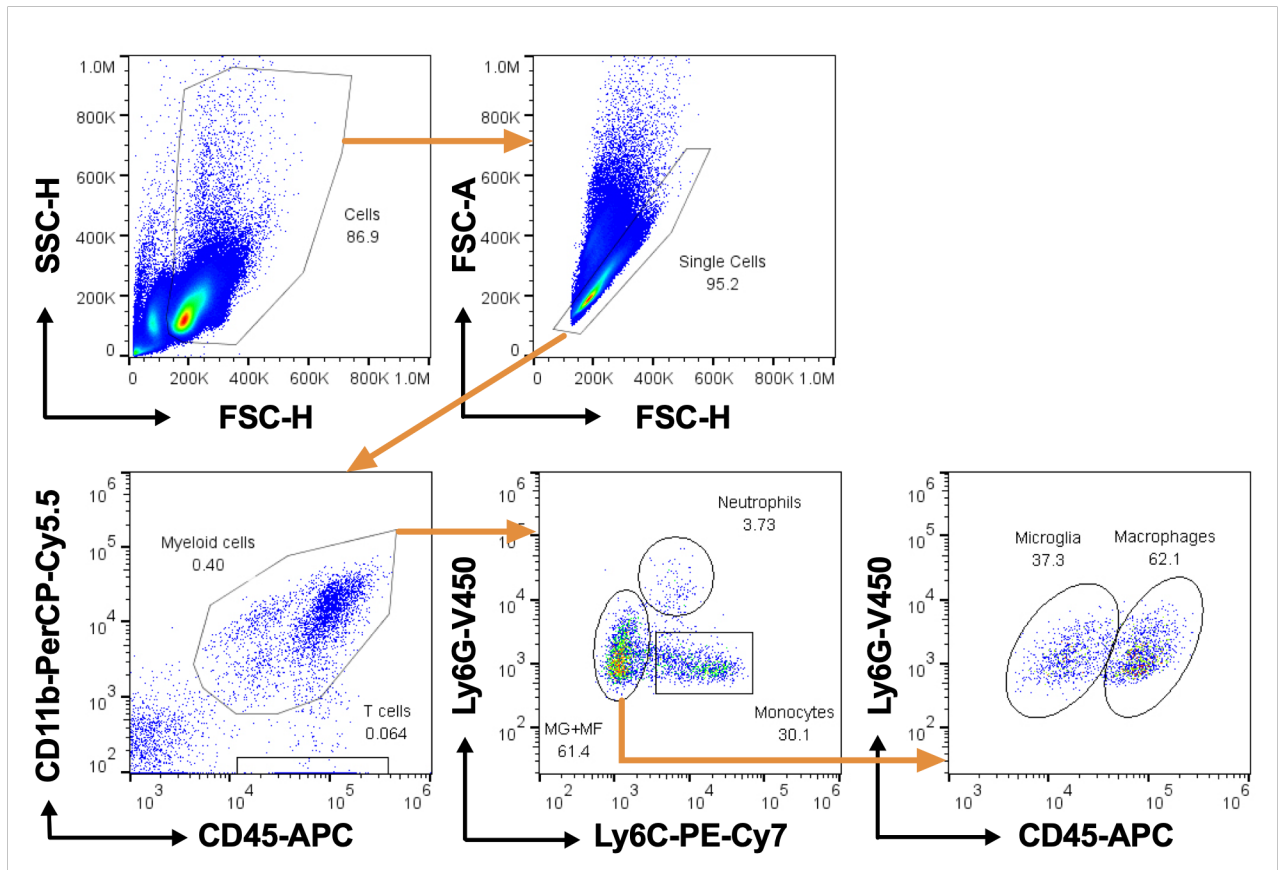

**Supplementary Figure 1. Gating strategy to separate immune cells populations.** After selection of cell population, we separated single cells, followed by selection of CD11b and CD45 positive cells. CD45<sup>+</sup>CD11b<sup>-</sup> cells were considered as lymphoid cells. CD45<sup>+</sup> CD11b<sup>+</sup> cells were a mix of bone marrow-derived myeloid cells and microglia. We separated them by Ly6G and Ly6C expression – Ly6G<sup>+</sup> cells are neutrophils, Ly6C<sup>+</sup> cells are freshly infiltrated monocytes. Ly6C low cells were separated into CD45<sup>low</sup> (microglia) and CD45<sup>hi</sup> (macrophage) cells.

Supplementary Figure 2.

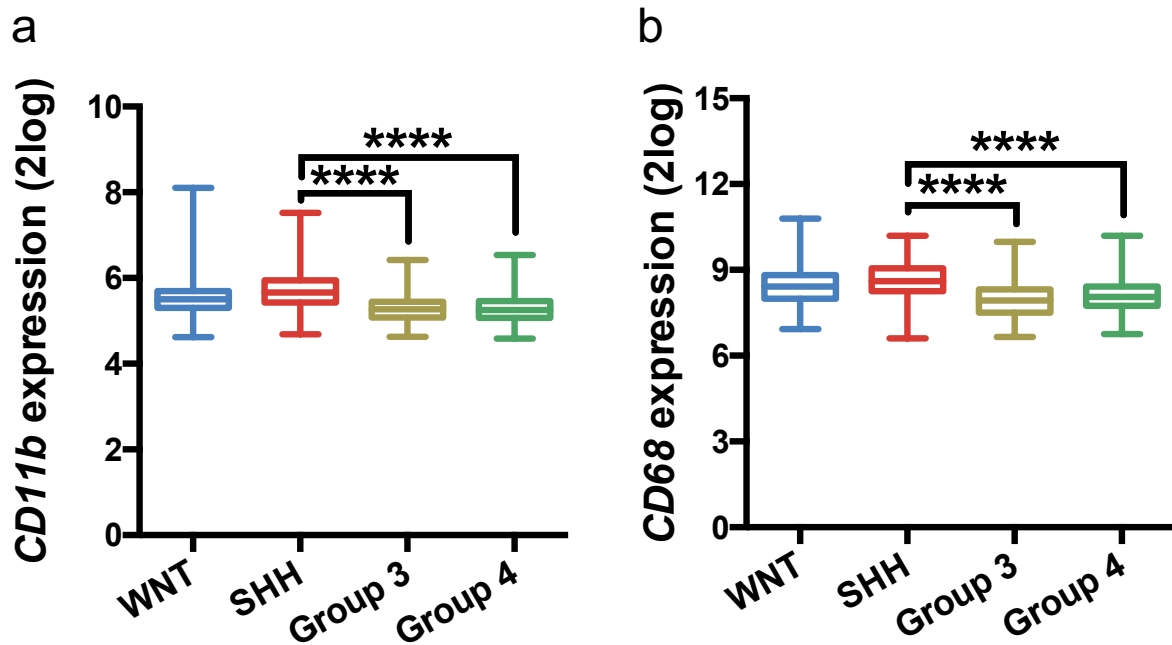

**Supplementary Figure 2. SHH medulloblastoma has pronounced activation of macrophage-associated genes.** Microarray data analysis of human patients MB cohort for macrophage-related genes *CD11b* (a), *CD68* (b) from previously published study<sup>15</sup>. WNT – Wingless, SHH – Sonic Hedgehog, N=70 (WNT), N=223 (SHH), N=144 (Group 3), N=326 (group 4). One way ANOVA with multiple comparisons. \*\*\*\* $P < 0.0001$  (F= 65.45 (a), 54.94 (b)).

# Supplementary Figure 3.

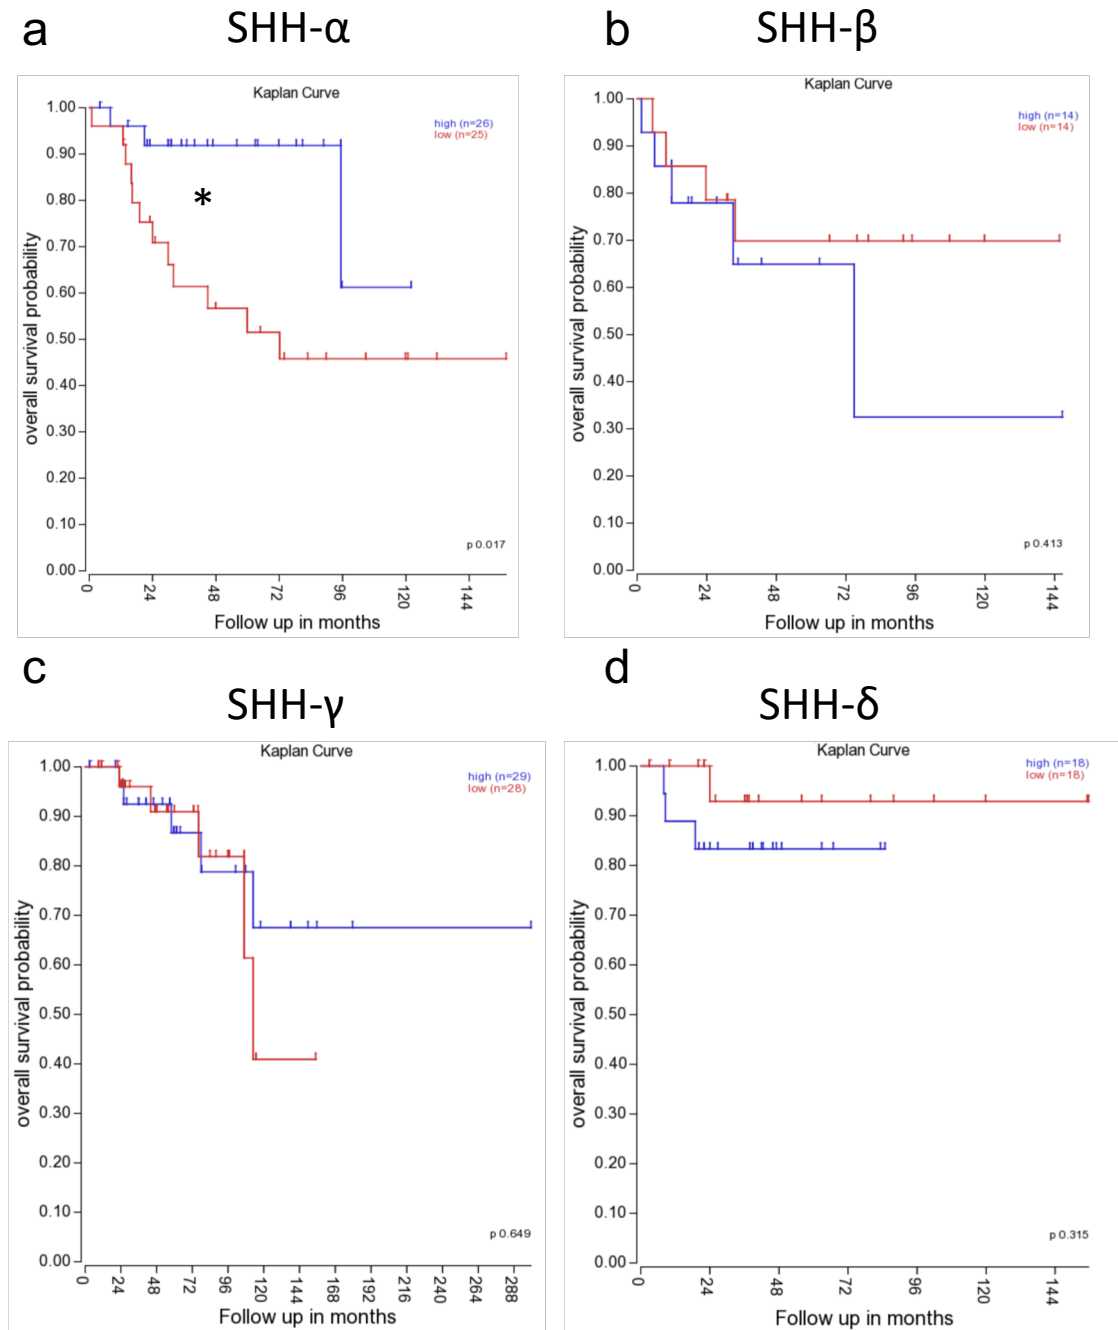

**Supplementary Figure 3. SHH medulloblastoma  $\alpha$  subtype patients have the highest survival benefit from presence of macrophages.** Kaplan curves for MB patients separated by SHH subgroup and differentiated by macrophage gene *AIF1* expression. Log-rank Mantel-Cox test, \* $P < 0.05$ .

## Supplementary Figure 4.

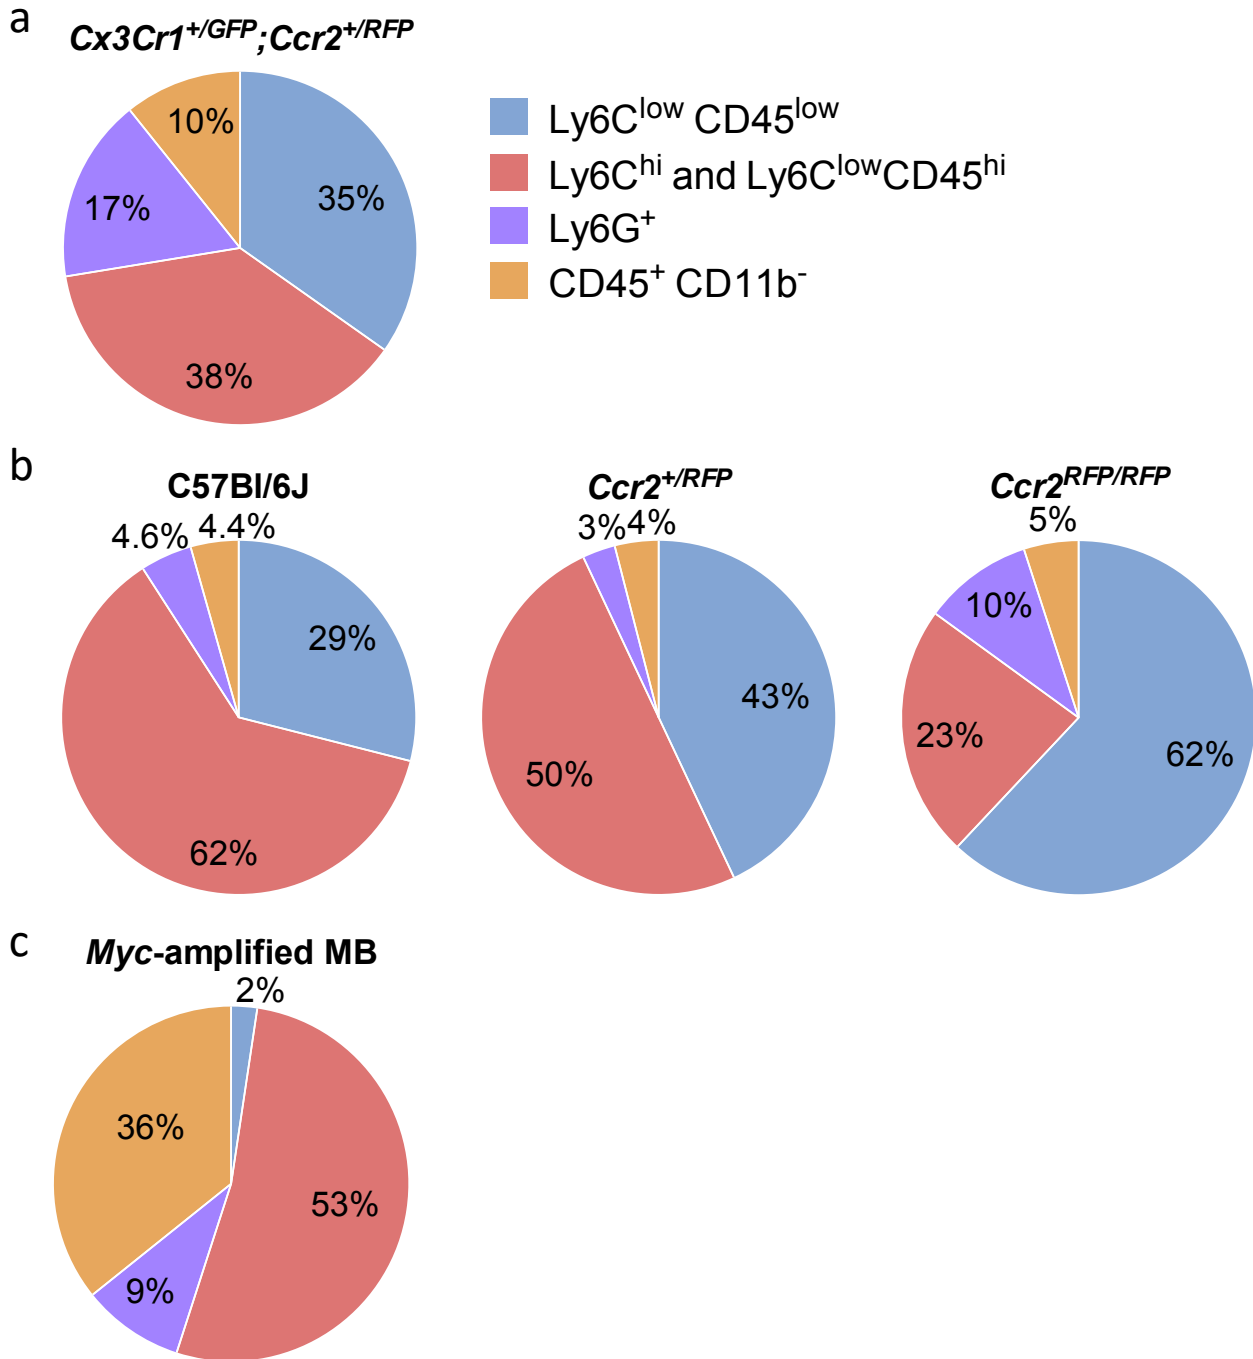

**Supplementary Figure 4. Deletion of *Ccr2* from tumour microenvironment decreases infiltration of macrophages in orthotopic implantation model.** A) Immune cell composition of *NeuroD2:SmoA1* tumours orthotopically implanted in *Ccr2<sup>+/RFP</sup>Cx3cr1<sup>+/GFP</sup>* mice for immune cells tracing, N=5. B) *NeuroD2:SmoA1* tumors orthotopically implanted in C57Bl/6J, N=9; *Ccr2<sup>+/RFP</sup>*, N=9; *Ccr2<sup>RFP/RFP</sup>*, N=7. C) *Myc*-amplified MB (group 3) model implanted in B6 mice (N=4).

## Supplementary Figure 5.

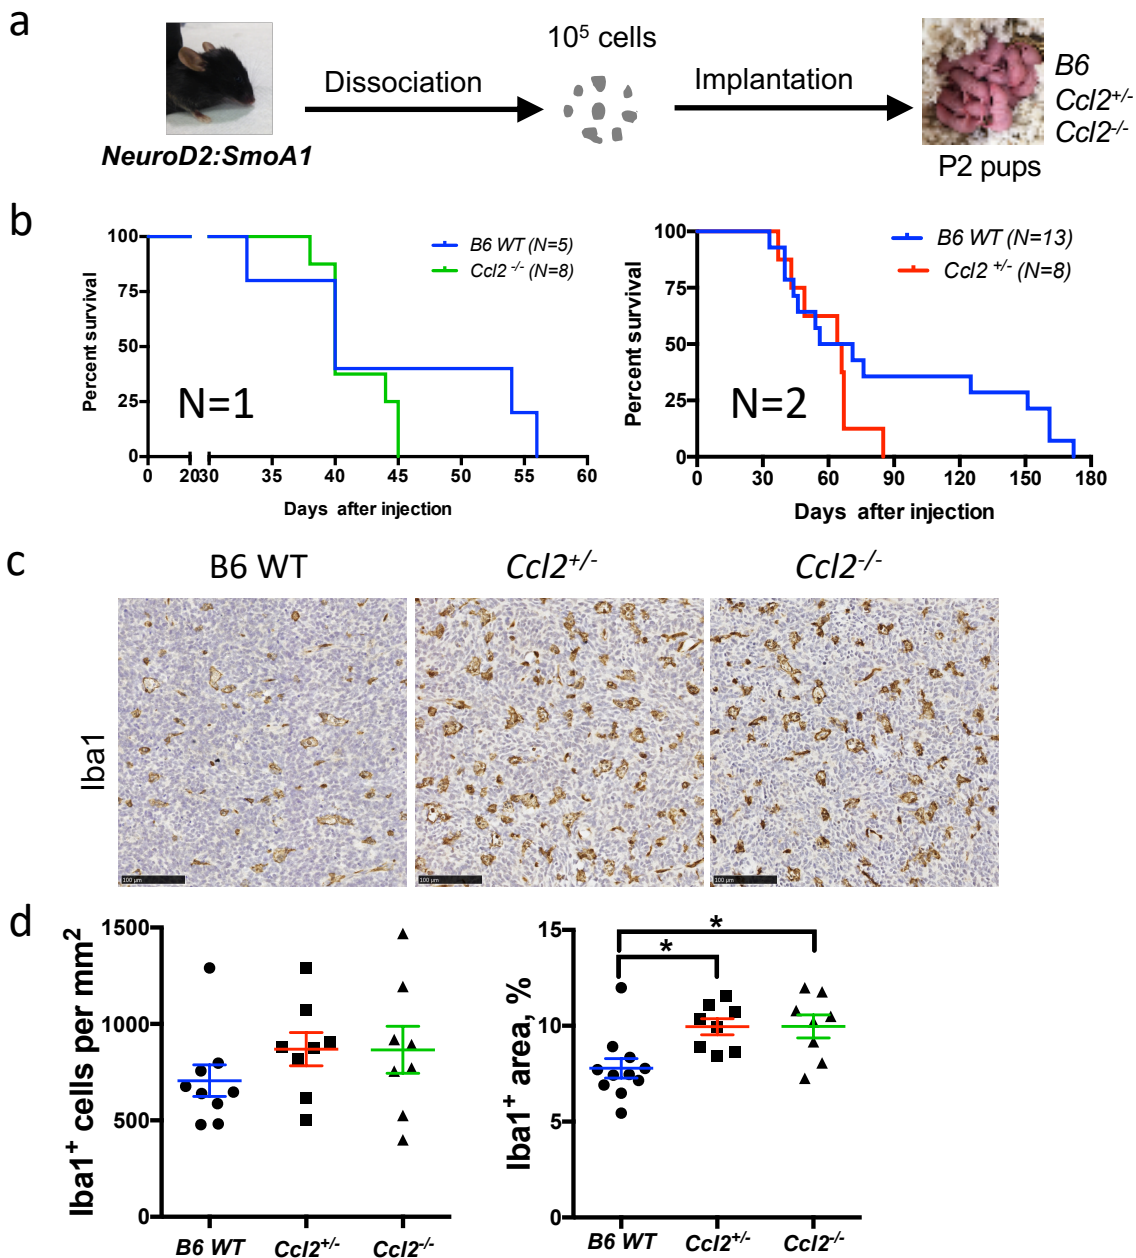

### Supplementary Figure 5. Generation of MB tumours in $Ccl2^{-/-}$ mice does not decrease number of TAMs. A) Schematic of animal experiments.

*NeuroD2:SmoA1* tumour tissue was extracted, dissociated into a single cell suspension and orthotopically injected into P2 pups of indicated genotypes. B) Kaplan-Meier graphs of genetically modified mice injected with *SmoA1* tumours,  $Ccl2^{-/-}$  ( $N=8$ , green),  $Ccl2^{+/-}$  ( $N=8$ , red), and  $Ccl2^{+/+}$  ( $N=13$ , blue),  $N$  represents indicated number of independent tumour injection experiments. C) Representative IHC images for TAM marker Iba1 in generated tumours. D) Quantification of Iba1<sup>+</sup> cells number and area in tumours at the endpoint,  $N=9$  for  $Ccl2^{+/+}$ ,  $N=8$  for  $Ccl2^{+/-}$  and  $Ccl2^{-/-}$ , Mean  $\pm$  S.E.M. One-way ANOVA,  $*P<0.05$ .

## Supplementary Figure 6.

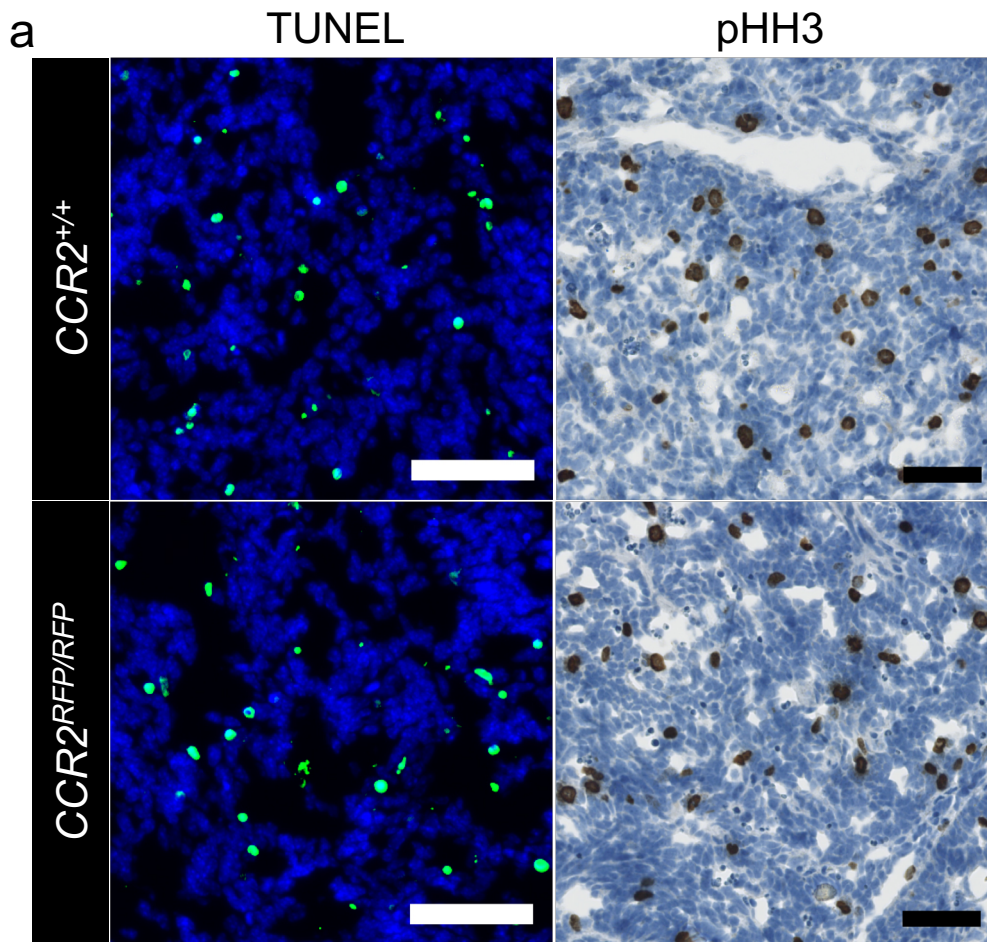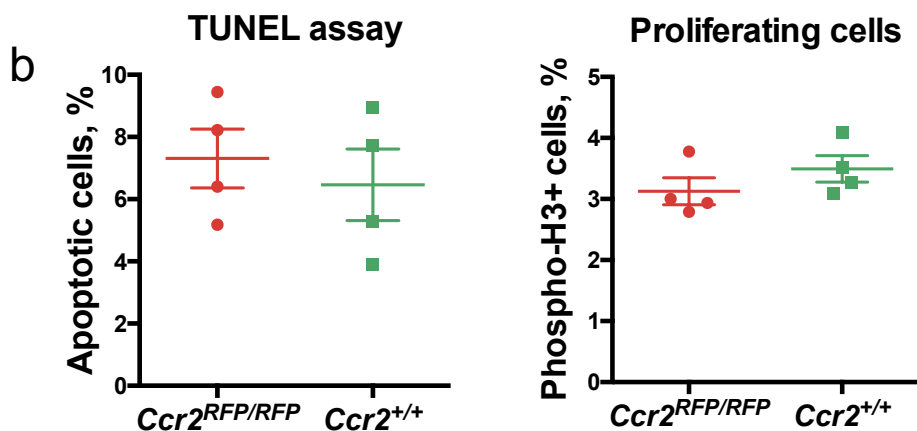

**Supplementary Figure 6. Deletion of *Ccr2* from tumour microenvironment does not affect apoptosis or proliferation levels at the endpoint.** A) TUNEL assay and phosphohistone-H3 immunohistochemistry analyses of tumours generated in *Ccr2<sup>+/+</sup>* and *Ccr2<sup>RFP/RFP</sup>* mice. Scale bars represents 50  $\mu$ m; data are representative of at least four independent experiments. B) Quantification of TUNEL or phosphohistone-H3 positive cells in (A). Each data point is an average value of at least five images analyzed. Mean  $\pm$  S.E.M. Mann-Whitney U test,  $P > 0.05$ .



# Supplementary Figure 7.

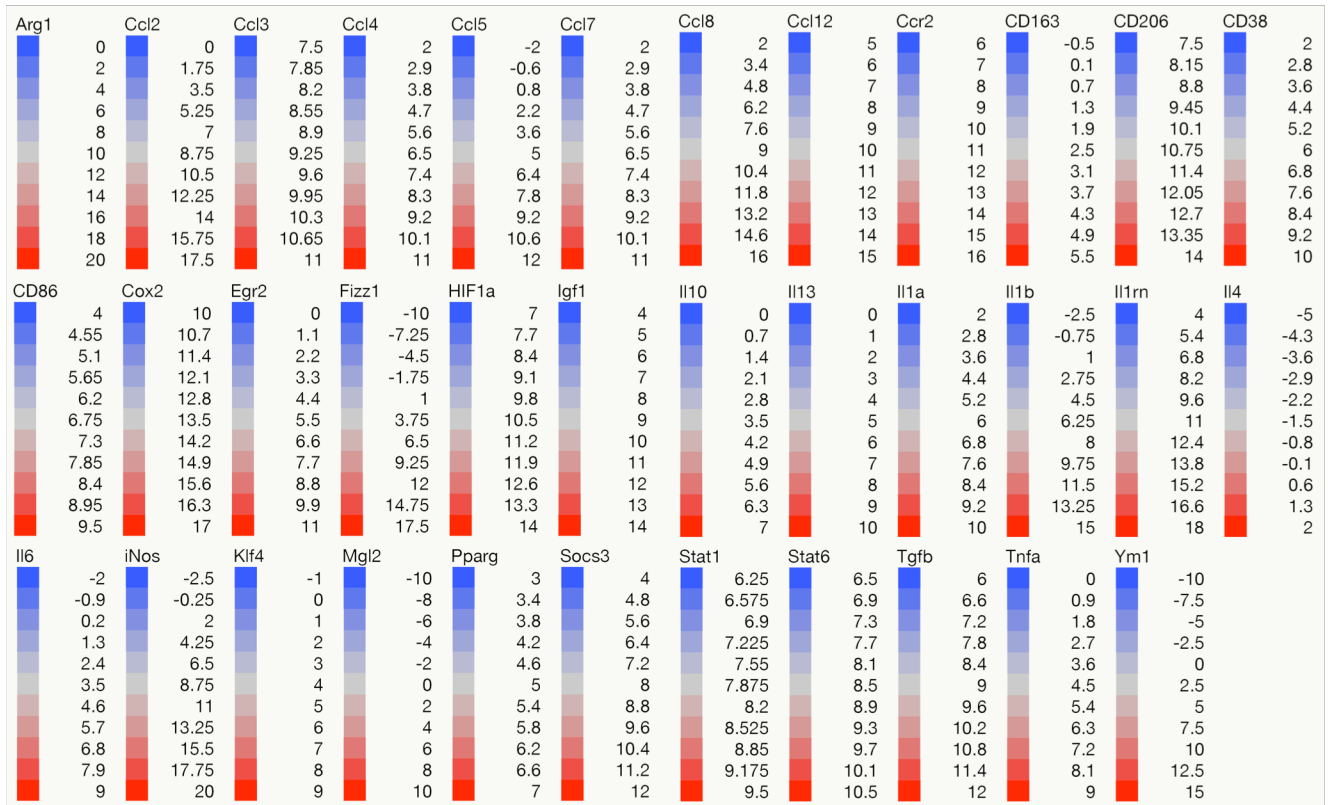

**Supplementary Figure 7.** Expression range (*log2* transformed) legends for microarray image shown in Fig. 5b.



Supplementary Figure 8.

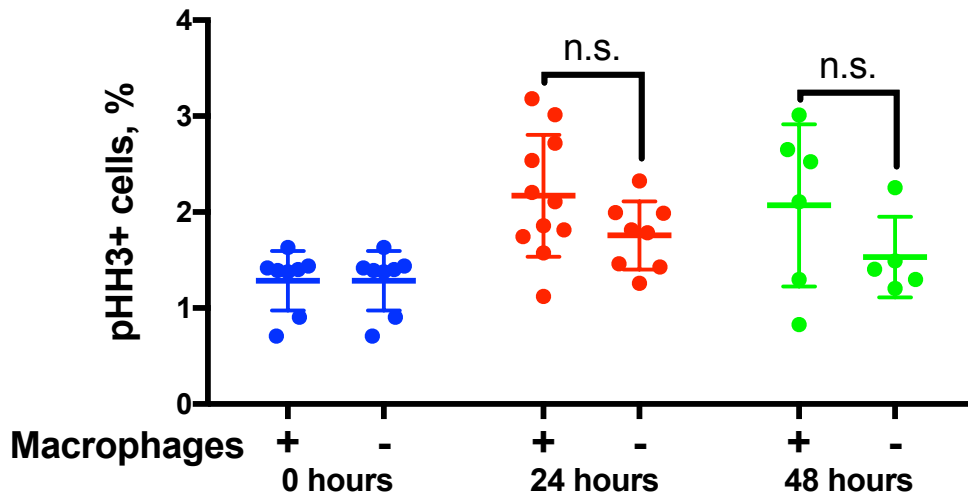

**Supplementary Figure 8. Macrophages presence does not affect tumour cells proliferation.** Tumour slices were exposed to cultured differentiated macrophages for up to 48 hours. Phospho histone-H3 IHC staining was quantified using whole slide scanning and image analysis as described in methods section. Mean  $\pm$  S.E.M., Mann-Whitney U test, n.s.  $P > 0.05$ .

Supplementary Table 1. List of PCR primers used in current work.

| Target name  | Forward primer 5'-3'     | Reverse primer 5'-3'     |
|--------------|--------------------------|--------------------------|
| <i>Ccl2</i>  | CCCACCTCACCTGCTGCTACT    | TCTGGACCCATTTCCTTCTTG    |
| <i>Actb</i>  | GGCTGTATTCCCCTCCATCG     | CCAGTTGGTAACAATGCCATGT   |
| <i>SOCS3</i> | TACTGAGCCGACCTCTCTC      | AGCTGGGTCACTTTCTCATA     |
| <i>COX2</i>  | CCGTCCCCTCACTAGGACTT     | ATCCTGGTCGGTTTGATGCT     |
| <i>CCL5</i>  | TGCCACAGTCAAGGAGTATTTT   | AACCCACTTCTTCTCTGGGTTG   |
| <i>STAT1</i> | TGGTCAAATTGCAAGAGCTG     | CAGACTTCCGTTGGTGGATT     |
| <i>HIF1a</i> | GGGTACAAGAAACCACCCAT     | GAGGCTGTGTGCGACTGAGAA    |
| <i>CCL3</i>  | ACTGCCTGCTGCTTCTCCTACA   | AGGAAAATGACACCTGGCTGG    |
| <i>CCL4</i>  | ACCATGAAGCTCTGCGTGTC     | CCATTGGTGCTGAGAACCCT     |
| <i>Cnn3</i>  | CATGACAGCCTATGGGACTC     | CTCCCGAGGGTAGTCGTCTG     |
| <i>Il1a</i>  | AGTCAACTCATTGGCGCTTGA    | AGAGAGATGGTCAATGGCAGA    |
| <i>CD38</i>  | GAAGACTACGCCCACTTGT      | ATGGGCCAGGTGTTTGGATT     |
| <i>IL10</i>  | GCTCTTACTGACTGGCATGAG    | CGCAGCTCTAGGAGCATGTG     |
| <i>CD163</i> | TGCTGTCACTAACGCTCCTG     | TCATTCATGCTCCAGCCGTT     |
| <i>PPARg</i> | GCCCTTTGGTGACTTTATGGA    | GCAGCAGGTTGTCTTGGATG     |
| <i>STAT6</i> | ACCTGTCCATTCGCTCACTG     | CTCTGGAGTAGGAAGGGGCT     |
| <i>KLF4</i>  | GTGCCCCGACTAACCGTTG      | GTCGTTGAACTCCTCGGTCT     |
| <i>IL4</i>   | AGATGGATGTGCCAAACGTCCTCA | AATATGCGAAGCACCTTGGAAGCC |
| <i>IL13</i>  | GGCAGCATGGTATGGAGTGT     | CTTGCGGTTACAGAGGCCAT     |
| <i>IGF1</i>  | AGACAGGCATTGTGGATGAG     | TGAGTCTTGGGCATGTCAGT     |
| <i>EGR2</i>  | TGCTAGCCCTTTCCGTTGA      | TCTTTTCCGCTGTCCTCGAT     |
| <i>MGL2</i>  | GATAACTGGCATGGACATATG    | TTTCTAATCACCATAACACATTC  |
| <i>Il1b</i>  | CAGGCTCCGAGATGAACAAC     | GGTGGAGAGCTTTCAGCTCATAT  |
| <i>iNOS</i>  | CCCTTCAATGGTTGGTACATGG   | ACATTGATCTCCGTGACAGCC    |
| <i>Arg1</i>  | GGAATCTGCATGGGCAACCTGT   | AGGGTCTACGTCTCGCAAGCCA   |
| <i>Fizz1</i> | TCCCAGTGAATACTGATGAGA    | CCACTCTGGATCTCCAAGA      |
| <i>Ym1</i>   | CAGGTCTGGCAATTCTTCTGAA   | GTCTTGCTCATGTGTGTAAGTGA  |
| <i>Il6</i>   | GCCTTCTTGGGACTGATGCT     | AGTCTCCTCTCCGACTTGTG     |
| <i>TNFa</i>  | AAGCCTGTAGCCCACGTCGTA    | GGCACCAGTGTGGTTGTCTTTG   |
| <i>CD86</i>  | TTGTGTGTGTTCTGGAAACGGAG  | AACTTAGAGGCTGTGTTGCTGGG  |
| <i>TGFb</i>  | CTTCAATACGTCAGACATTCGGG  | GTAACGCCAGGAATTGTTGCTA   |
| <i>CD206</i> | GGCAGGATCTTGGCAACCTAGTA  | CCTTTCTTCCGACTCTTCACCC   |
| <i>Ccr2</i>  | TGTGATTGACAAGCACTTAGACC  | TGGAGAGATACCTTCGGAAGCTT  |
